# Supplementary material for: Spontaneous vesicle formation and vesicle-to-α-gel transition in aqueous mixtures of sodium monododecylphosphate and guanidinium salts
Source: Royal Society of Chemistry journal article supplement (doi:10.1039/d1sm00303h), 2021-01-01
Supplement: d1sm00303h1.pdf [file d1sm00303h1.pdf]

## **Electronic Supplementary Information**

### **Spontaneous vesicle formation and vesicle-to- $\alpha$ -gel transition in aqueous mixtures of sodium monododecylphosphate and guanidinium salts**

Meihua Gao,<sup>a</sup> Na Du,\*<sup>a</sup> Zhiyin Yao,<sup>a</sup> Ying Li,<sup>a</sup> Nan Chen,<sup>a</sup> Wanguo Hou\*<sup>a,b</sup>

<sup>a</sup> Key Laboratory of Colloid & Interface Chemistry (Ministry of Education), Shandong University, Jinan, 250100, P. R. China.

<sup>b</sup> National Engineering Technology Research Center of Colloidal Materials, Shandong University, Jinan 250100, P. R. China.

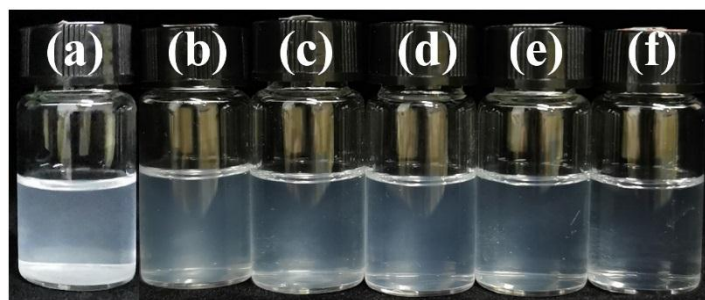

**Fig. S1** Photographs of SDP (0.15 wt% or ~5 mM)/H<sub>2</sub>O mixtures (a) in the absence of GuSalts and (b–f) in the presence of 0.30 wt% (b) GuCl, (c) GuSO<sub>4</sub>, (d) GuSO<sub>3</sub>, (e) GuPO<sub>4</sub>, and (f) GuCO<sub>3</sub>. All samples were placed at 25.0 °C for at least 48 h before the observation.

To clearly see the sediment, choose black as the background of photos.

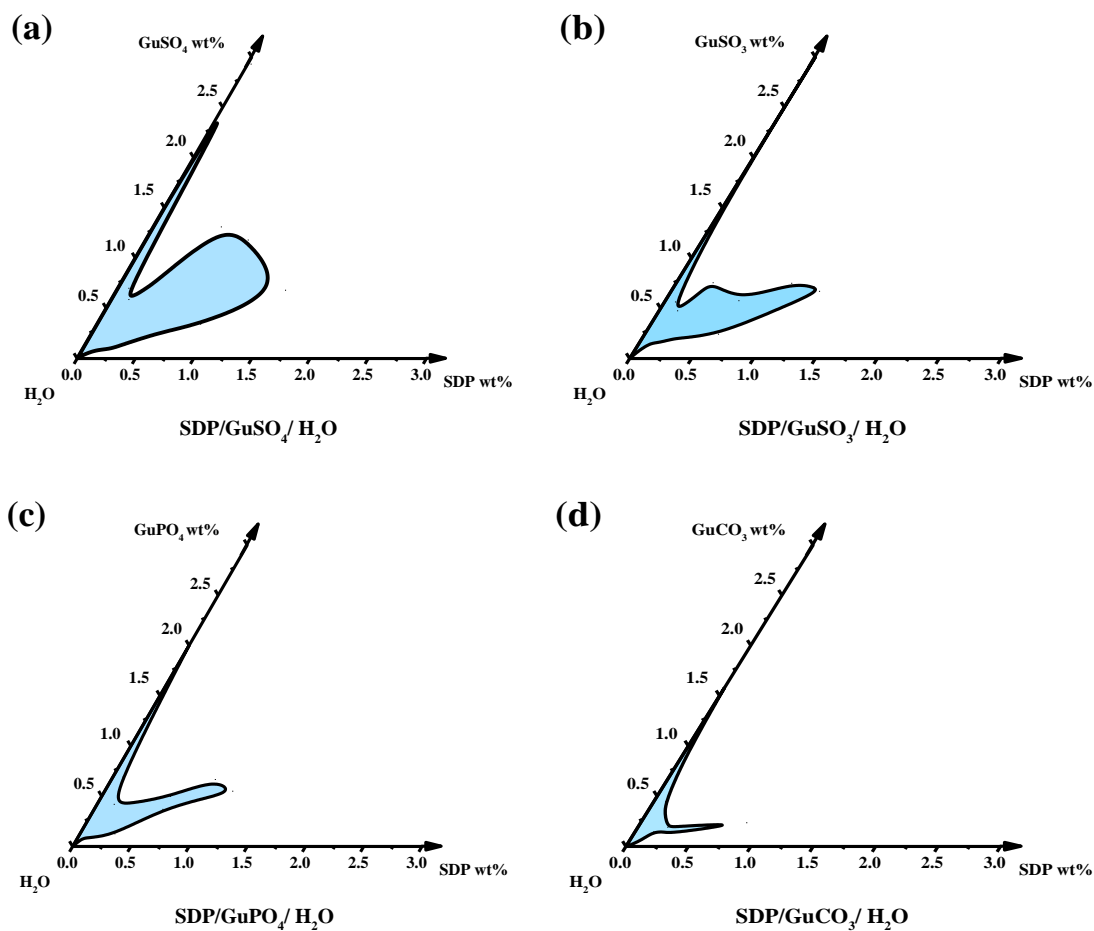

**Fig. S2** Isotropic phase diagrams of SDP/GuSalt/H<sub>2</sub>O ternary systems at 25.0 °C.

**Table S1** The pK<sub>a</sub> values of acid at 25.0 °C.

| Acid              | Chemical formula                  | pK <sub>a1</sub> <sup>[S1]</sup> |
|-------------------|-----------------------------------|----------------------------------|
| Hydrochloric acid | HCl                               | -6.30                            |
| Sulfuric acid     | H <sub>2</sub> SO <sub>4</sub>    | -3.00                            |
| Sulfamic acid     | NH <sub>2</sub> SO <sub>3</sub> H | 0.99                             |
| Phosphoric acid   | H <sub>3</sub> PO <sub>4</sub>    | 2.15                             |
| Carbonic acid     | H <sub>2</sub> CO <sub>3</sub>    | 6.35                             |

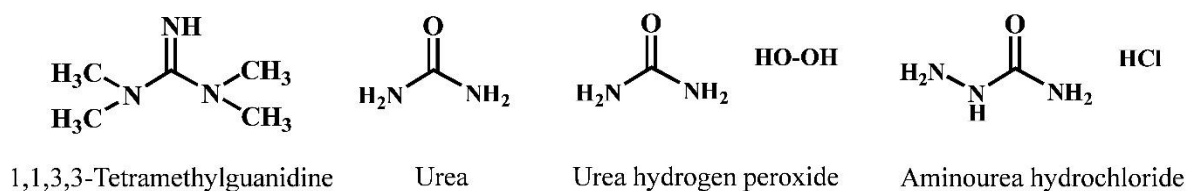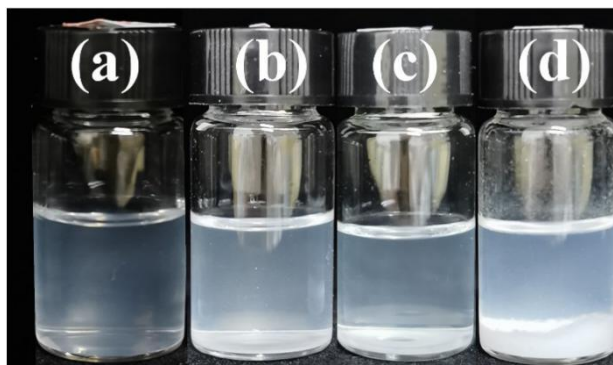

**Fig. S3** Photographs of SDP (0.15 wt% or ~5 mM)/H<sub>2</sub>O mixtures in the presence of (a) 1,1,3,3-tetramethylguanidine, (b) urea, (c) urea hydrogen peroxide, and (d) aminourea hydrochloride. All samples were placed at 25.0 °C for at least 48 h before the observation.

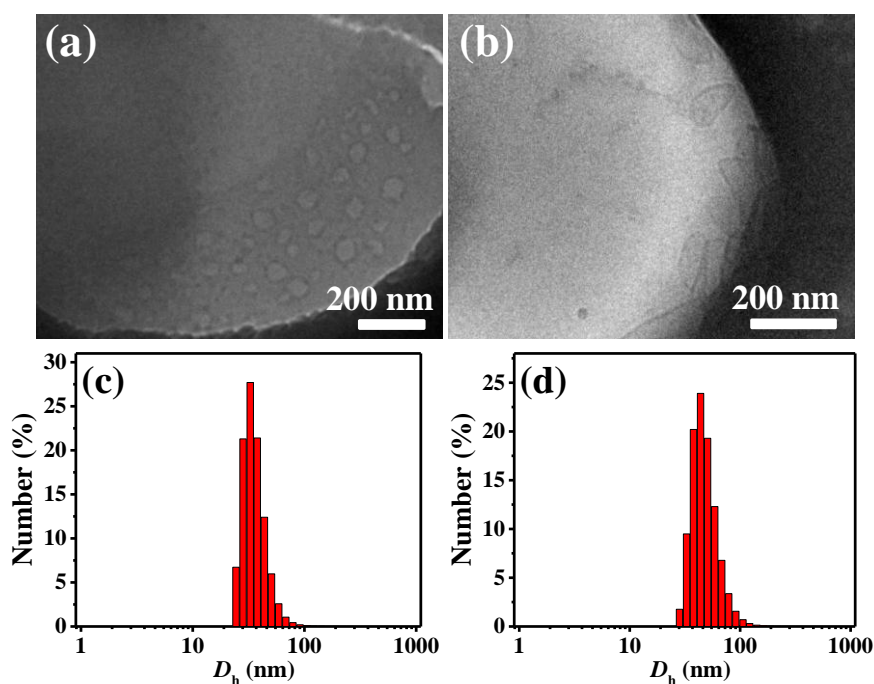

**Fig. S4** (a, b) Cryo-TEM images and (c, d) size distributions of SDP/GuCl/H<sub>2</sub>O systems with different compositions at 25.0 °C. (a, c) 0.90 wt% (or ~30 mM) SDP, 0.55 wt% (or ~57 mM) GuCl; (b, d) 1.50 wt% (or ~50 mM) SDP, 0.55 wt% (or ~57 mM) GuCl.

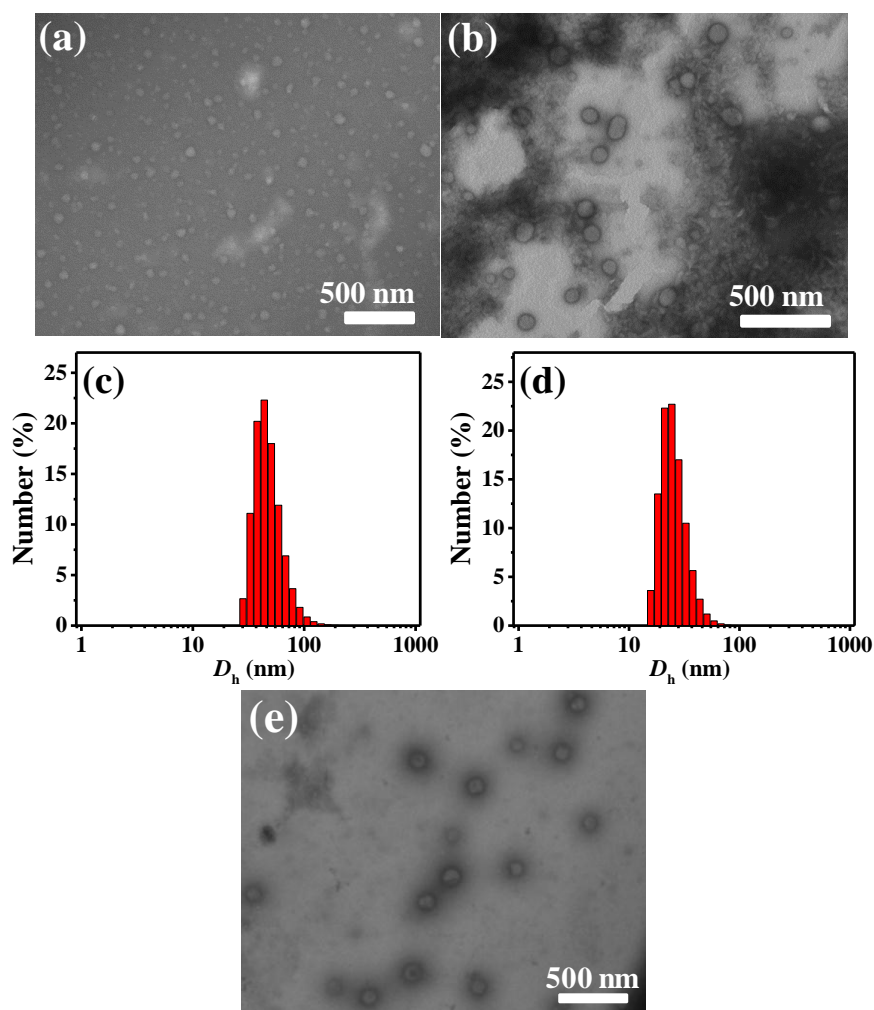

**Fig. S5** (a, b, e) NS-TEM images and (c, d) size distributions of SDP/GuSO<sub>4</sub>/H<sub>2</sub>O systems with different compositions at 25.0 °C. (a, c) 0.15 wt% (or ~5 mM) SDP, 0.30 wt% (or ~28 mM) GuSO<sub>4</sub>; (b, d) 0.60 wt% (or ~20 mM) SDP, 0.55 wt% (or ~51 mM) GuSO<sub>4</sub>; (e) 0.15 wt% (or ~5 mM) SDP, 0.34 wt% (or ~31 mM) GuSO<sub>4</sub>.

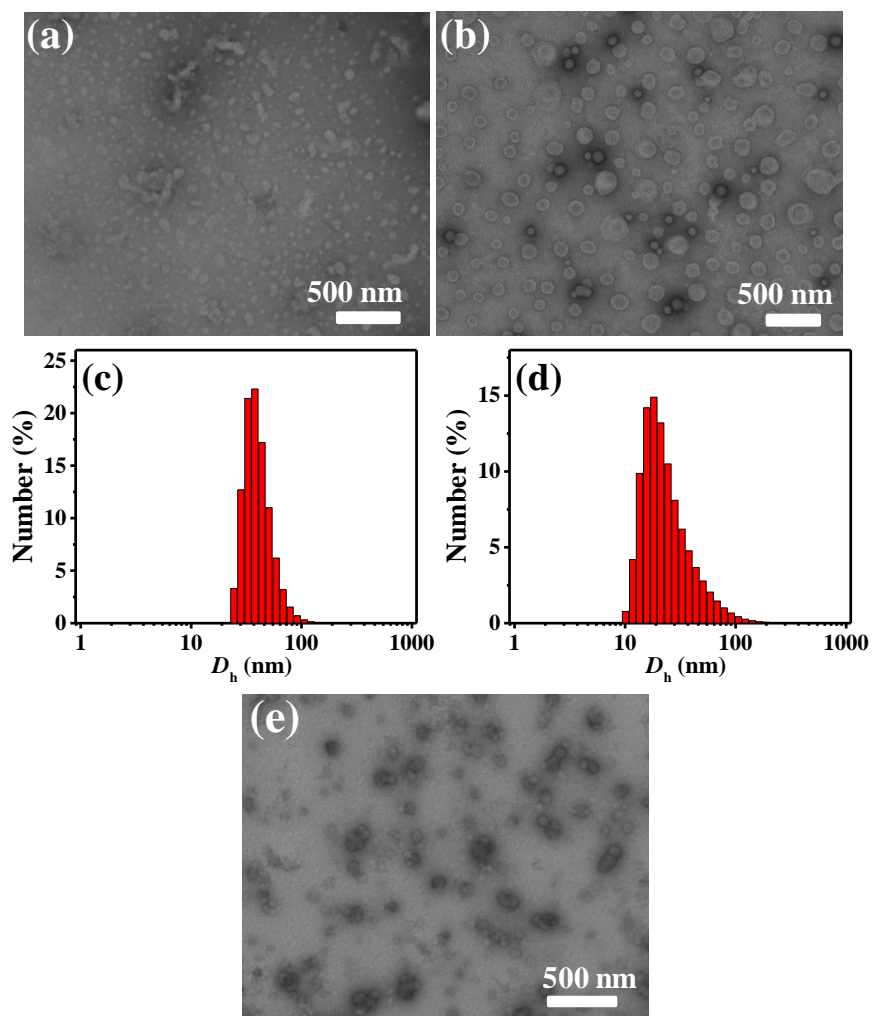

**Fig. S6** (a, b, e) NS-TEM images and (c, d) size distributions of SDP/GuSO<sub>3</sub>/H<sub>2</sub>O systems with different compositions at 25.0 °C. (a, c) 0.15 wt% (or ~5 mM) SDP, 0.30 wt% (or ~19 mM) GuSO<sub>3</sub>; (b, d) 0.60 wt% (or ~20 mM) SDP, 0.55 wt% (or ~35 mM) GuSO<sub>3</sub>; (e) 0.15 wt% (or ~5 mM) SDP, 0.49 wt% (or ~31 mM) GuSO<sub>3</sub>.

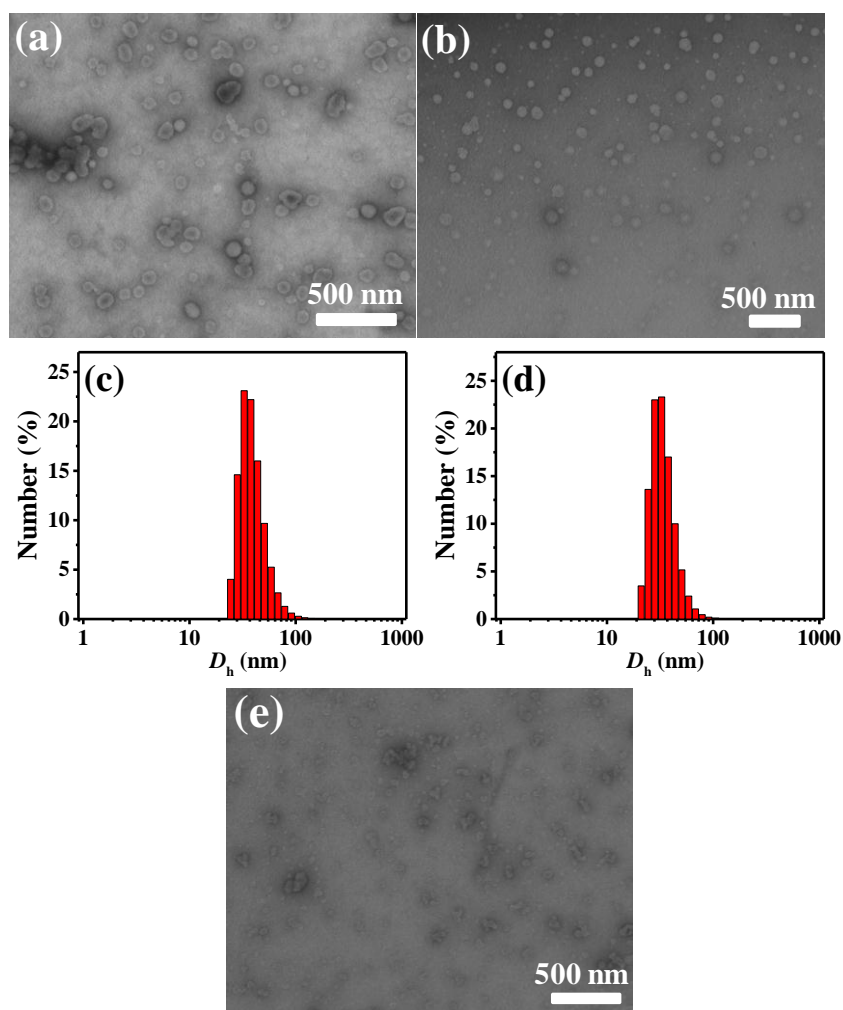

**Fig. S7** (a, b, e) NS-TEM images and (c, d) size distributions of SDP/GuPO<sub>4</sub>/H<sub>2</sub>O systems with different compositions at 25.0 °C. (a, c) 0.15 wt% (or ~5 mM) SDP, 0.30 wt% (or ~28 mM) GuPO<sub>4</sub>; (b, d) 0.60 wt% (or ~20 mM) SDP, 0.55 wt% (or ~51 mM) GuPO<sub>4</sub>; (e) 0.15 wt% (or ~5 mM) SDP, 0.34 wt% (or ~31 mM) GuPO<sub>4</sub>.

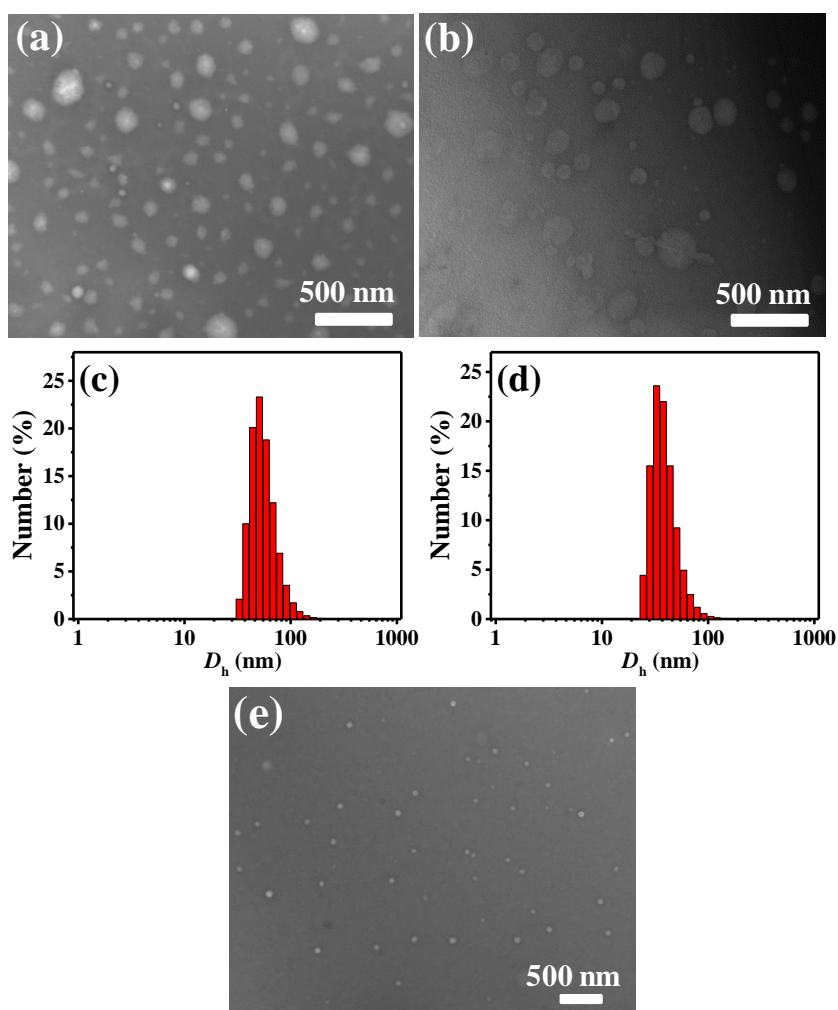

**Fig. S8** (a, b, e) NS-TEM images and (c, d) size distributions of SDP/GuCO<sub>3</sub>/H<sub>2</sub>O systems with different compositions at 25.0 °C. (a, c) 0.15 wt% (or ~5 mM) SDP, 0.30 wt% (or ~34 mM) GuCO<sub>3</sub>; (b, d) 0.60 wt% (or ~20 mM) SDP, 0.21 wt% (or ~23 mM) GuCO<sub>3</sub>; (e) 0.15 wt% (or ~5 mM) SDP, 0.27 wt% (or ~31 mM) GuCO<sub>3</sub>.



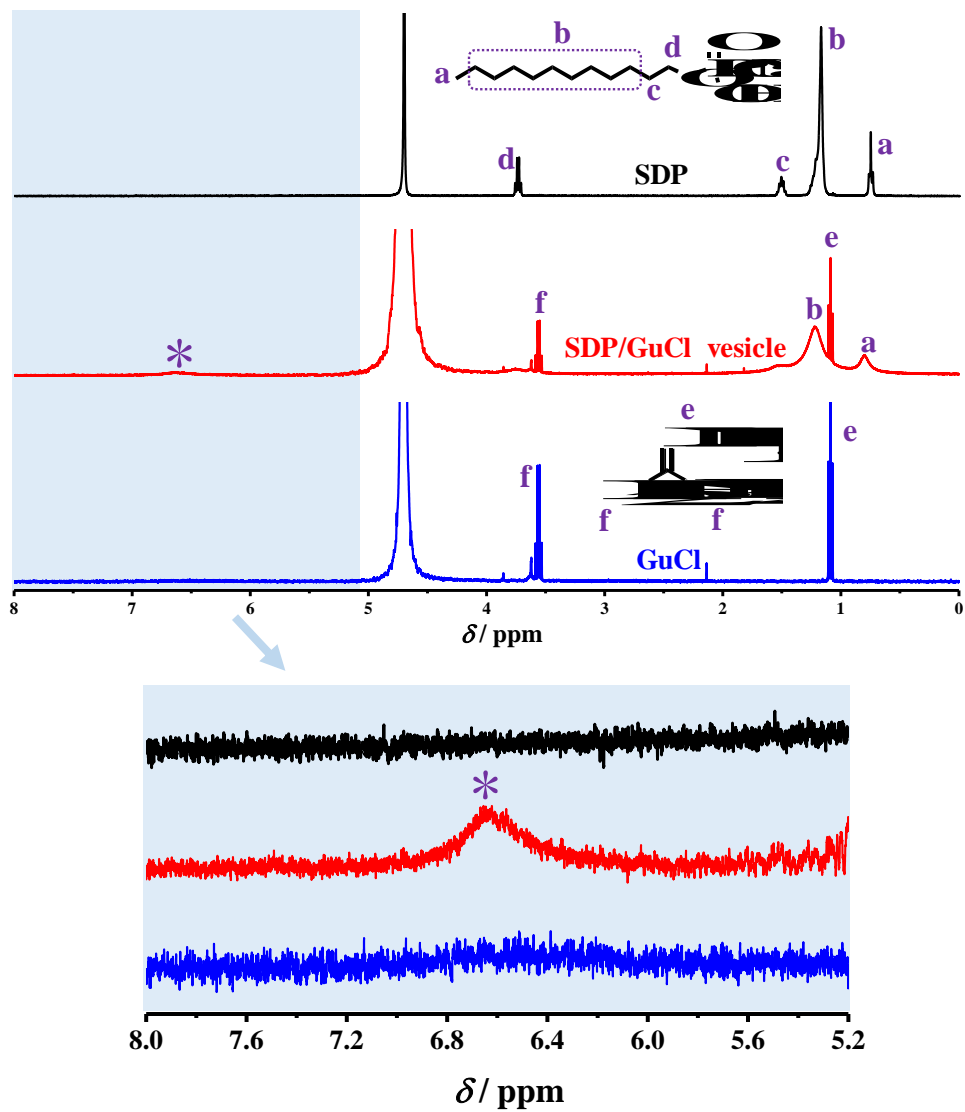

**Fig. S9**  $^1\text{H}$  NMR spectra of SDP, CuCl<sub>2</sub>, and SDP/GuCl vesicle in  $\text{D}_2\text{O}$ .

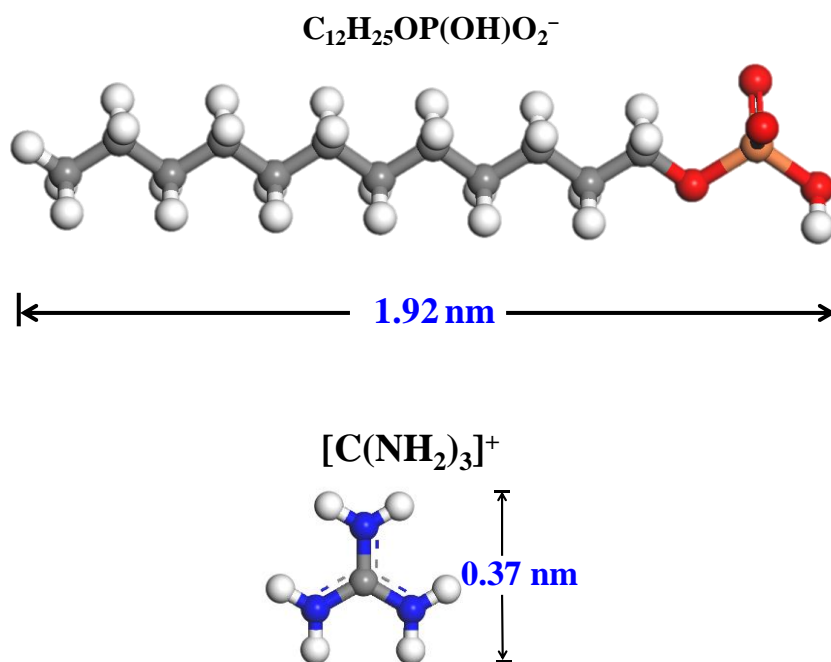

**Fig. S10** Energy-minimized structures of sodium monododecylphosphate and guanidine via the density functional theory by Gaussian 9.0. The atom coloring scheme is: C, gray; H, white; P, orange; O, red; N, blue.

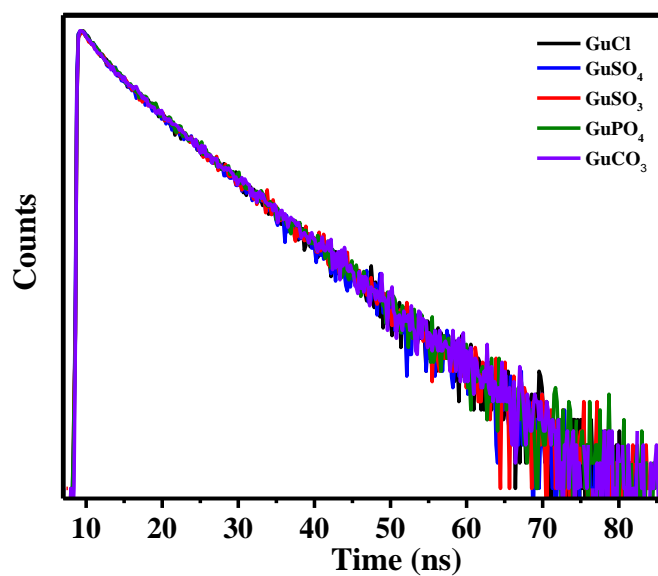

**Fig. S11** Fluorescence intensity decay of DPH in SDP/GuSalt/H<sub>2</sub>O solutions (0.15 wt% or ~5 mM SDP, 0.30 wt% GuSalt) at 25.0 °C ( $\lambda_{ex} = 377$  nm,  $\lambda_{em} = 450$  nm).

**Table S2** Lifetime ( $\tau_f$ ),  $\chi^2$ , and correlation time ( $\tau_R$ ) of DPH in SDP/GuSalt/H<sub>2</sub>O solutions (0.15 wt% or ~5 mM SDP, 0.30 wt% GuSalt) at 25.0 °C.

| GuSalt            | $\tau_f$ (ns) | $\chi^2$ | $\tau_R$ (ns) |
|-------------------|---------------|----------|---------------|
| GuCl              | 9.66, 2.49    | 1.02     | 3.69          |
| GuSO <sub>4</sub> | 9.62, 2.29    | 1.01     | 3.18          |
| GuSO <sub>3</sub> | 9.82, 2.62    | 0.98     | 3.25          |
| GuPO <sub>4</sub> | 9.76, 2.46    | 0.95     | 3.23          |
| GuCO <sub>3</sub> | 9.83, 2.27    | 0.95     | 2.79          |

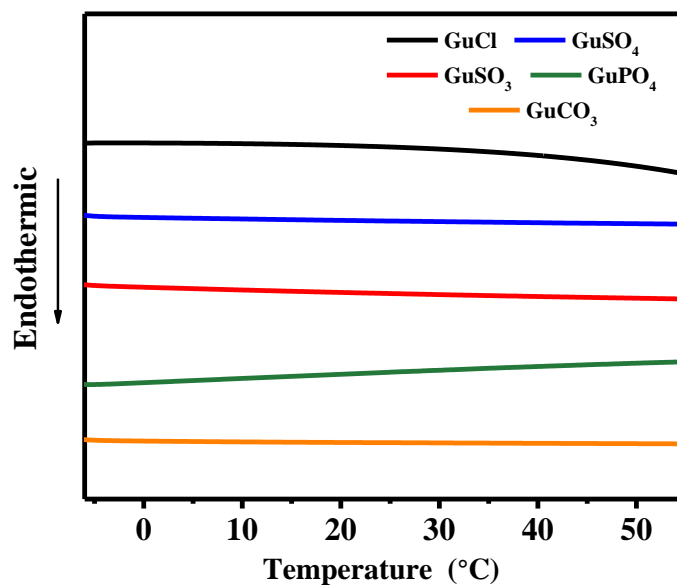

**Fig. S12** DSC trace for SDP/GuSalt/H<sub>2</sub>O systems (~5 mM or 0.15 wt% SDP, 0.30 wt% GuSalt).

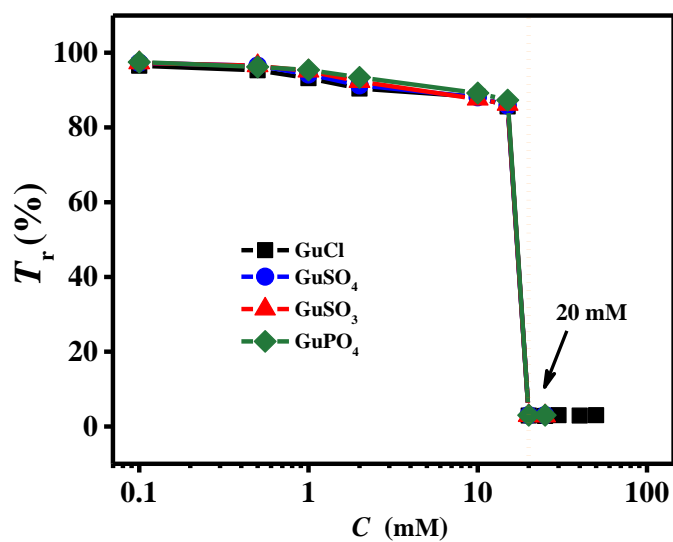

**Fig. S13** Change of  $T_r$  with SDP concentration ( $C$ ) for SDP/GuSalt/H<sub>2</sub>O solutions at 8.0 °C.

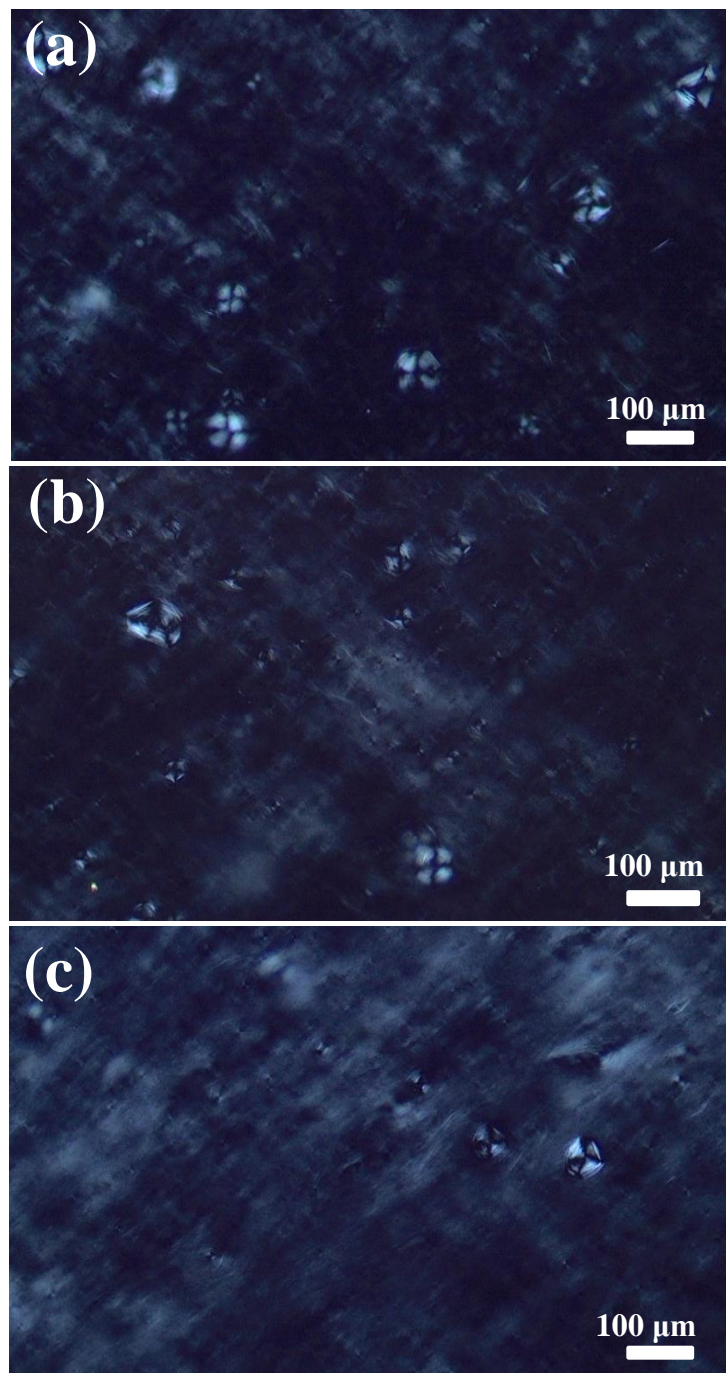

**Fig. S14** Polarizing micrographs of SDP/GuSalt/H<sub>2</sub>O systems (0.90 wt% SDP, 0.55 wt% GuSalt) at 8.0 °C. (a) GuSO<sub>4</sub>, (b) GuSO<sub>3</sub>, and (c) GuPO<sub>4</sub>.

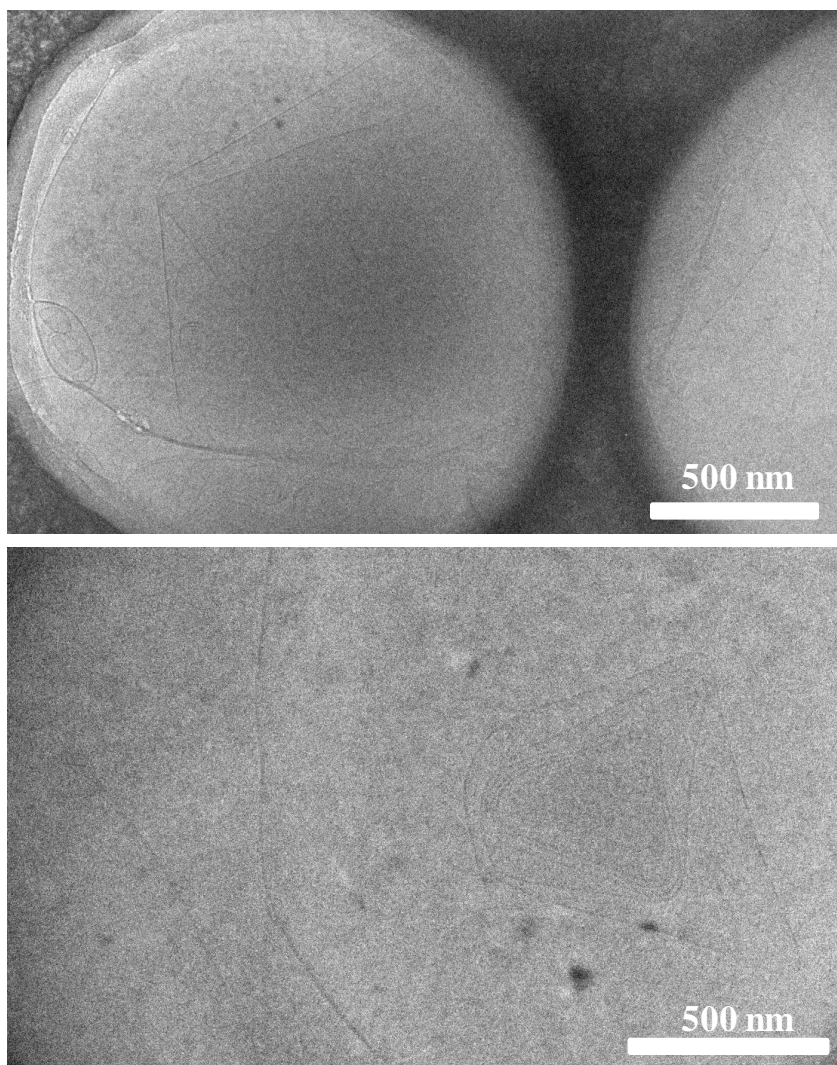

**Fig. S15** Cryo-TEM images of SDP/GuCl/H<sub>2</sub>O system (0.90 wt% SDP, 0.55 wt% GuCl) at 8.0 °C.

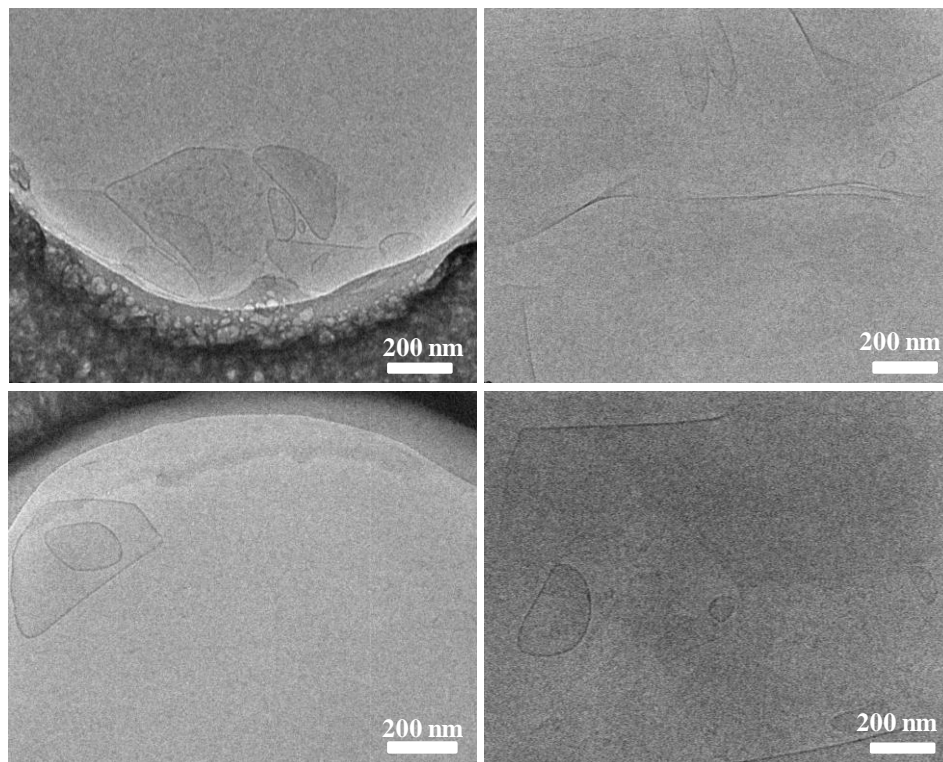

**Fig. S16** Cryo-TEM images of SDP/GuPO<sub>4</sub>/H<sub>2</sub>O system (0.90 wt% SDP, 0.55 wt% GuPO<sub>4</sub>) at 8.0 °C.

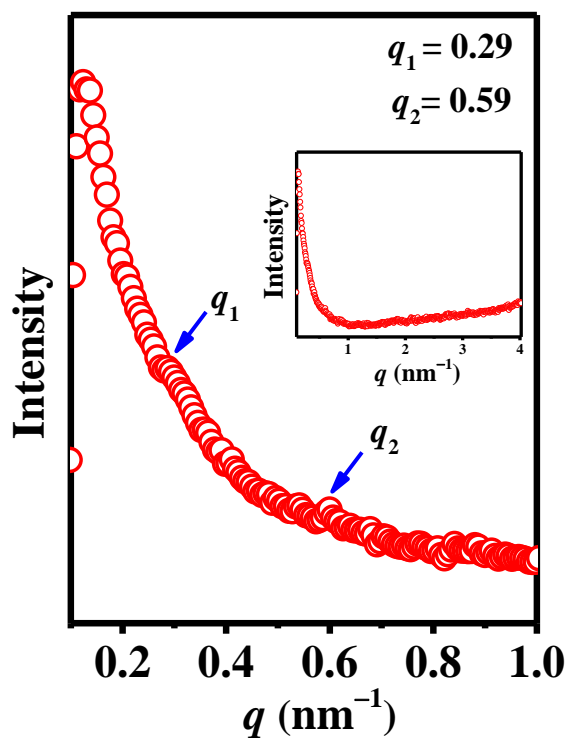

**Fig. S17** Small-angle X-ray scattering curve of SDP/GuCl/H<sub>2</sub>O systems (0.90 wt% SDP, 0.55 wt% GuCl) at 8.0 °C. The scattering peaks for the system can be indexed as a lamellar structure.

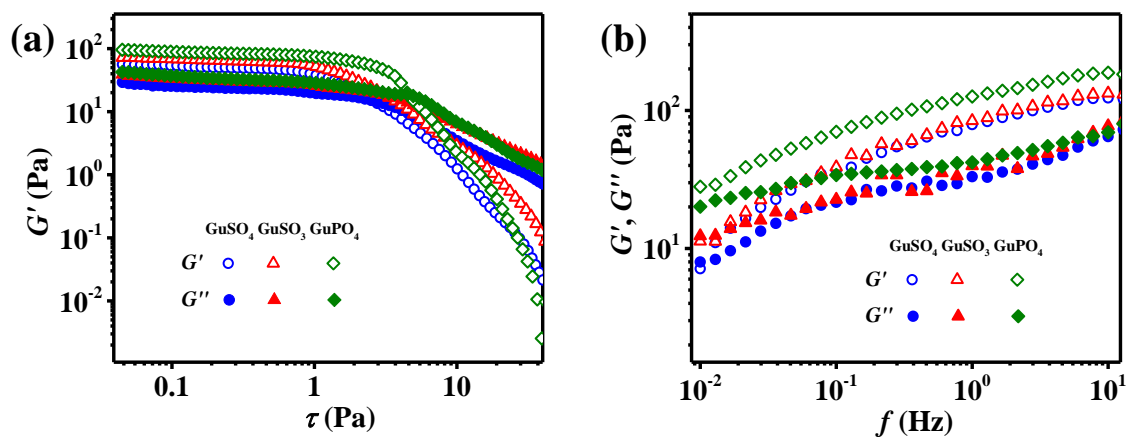

**Fig. S18** (a) Stress sweep and (b) frequency sweep of gel samples for SDP/GuSalt/H<sub>2</sub>O systems (0.90 wt% SDP, 0.55 wt% GuSalt) at 8.0 °C.

## Reference

[S1] G. S. James, Lange's Handbook of Chemistry 16<sup>th</sup>: McGraw-Hill, 2005.
